# Supplementary material for: First-principles study of nitrogen-doped nanographene as an efficient charge transport and nonlinear optical material
Source: Royal Society of Chemistry journal article supplement (doi:10.1039/c7ra02455j), 2017-01-01
Supplement: c7ra02455j1.pdf [file c7ra02455j1.pdf]

## Supporting information

### First-Principles Study of Nitrogen-doped Nanographene as Efficient Charge transport and Nonlinear Optical Material

Shabbir Muhammad <sup>a,b</sup>, Aijaz Rasool Chaudhry <sup>a,b</sup>, Ahmad Irfan<sup>b,c</sup> Abdullah G. Al-Sehemi<sup>b,c</sup>

<sup>a</sup> Department of Physics, College of Science, King Khalid University, Abha 61413, P.O. Box 9004, Saudi Arabia

<sup>b</sup> Research Center for Advanced Materials Science (RCAMS), King Khalid University, Abha 61413, P.O. Box 9004, Saudi Arabia

<sup>c</sup> Department of Chemistry, College of Science, King Khalid University, Abha 61413, P.O. Box 9004, Saudi Arabia

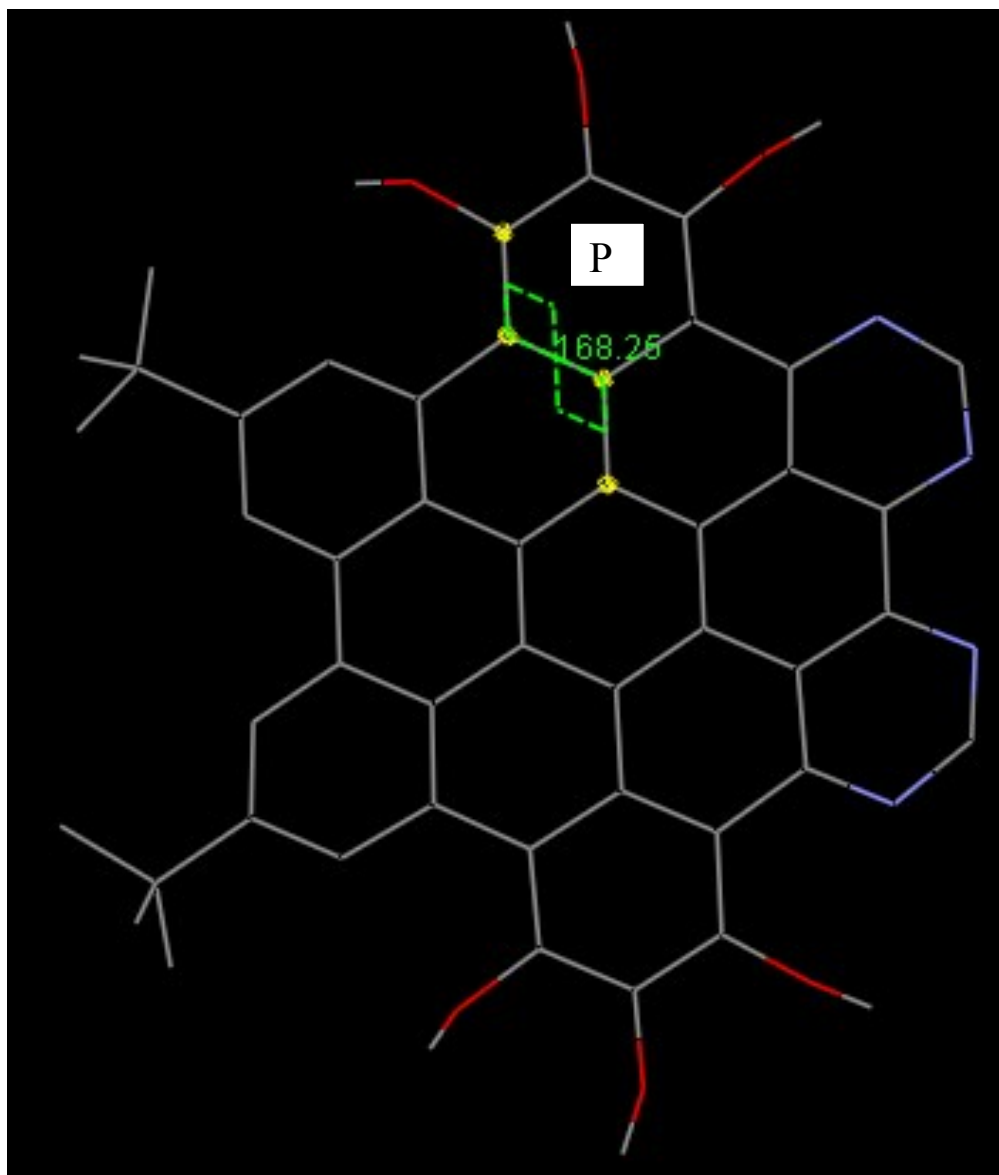

Fig. S1. Experimental Crystallographic structure showing slight distortion of the planar core due to steric congestion

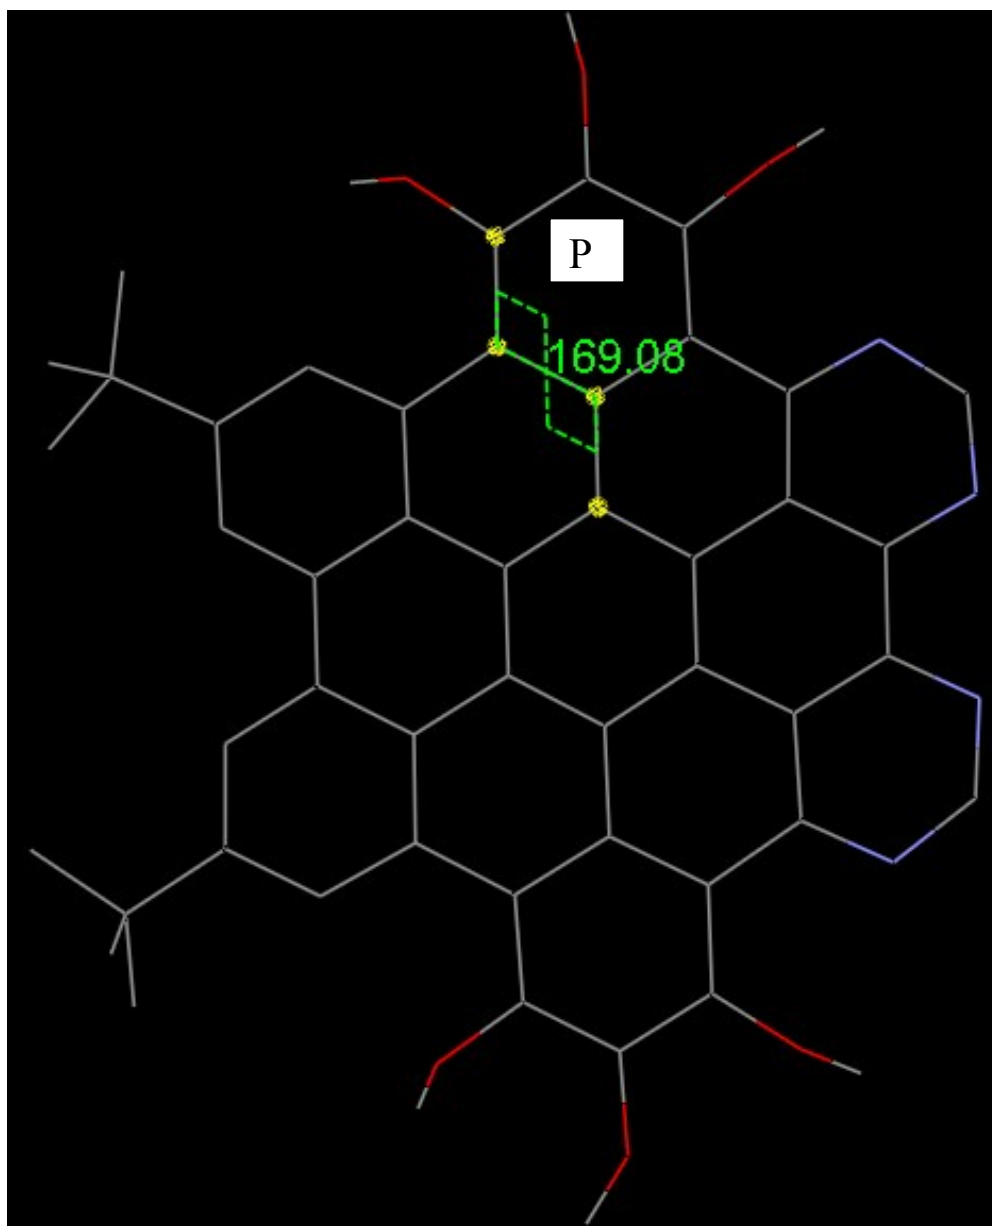

Fig. S2. Computed geometry within PBC showing distortion of the planar core due to steric congestion

**Table S1.** The second-order polarizability ( $\beta_{\text{tot}}$ ), its individual components for NDG compound **1** using four different methods and 6-311G\* basis sets

|                                               | PBE0                        | B3LYP                       | M06                         | CAM-B3LYP                   |
|-----------------------------------------------|-----------------------------|-----------------------------|-----------------------------|-----------------------------|
| Components                                    | $\times 10^{-30}\text{esu}$ | $\times 10^{-30}\text{esu}$ | $\times 10^{-30}\text{esu}$ | $\times 10^{-30}\text{esu}$ |
| $\beta_{\text{xxx}}$                          | -1.29                       | -1.42                       | -1.12                       | -1.03                       |
| $\beta_{\text{xyy}}$                          | -3.18                       | -3.15                       | -2.97                       | -2.33                       |
| $\beta_{\text{xyy}}$                          | -0.36                       | -0.36                       | -0.36                       | -0.18                       |
| $\beta_{\text{yyy}}$                          | 0.79                        | 0.76                        | 0.83                        | -0.63                       |
| $\beta_{\text{xxz}}$                          | 8.23                        | 8.22                        | 7.71                        | 5.79                        |
| $\beta_{\text{xyz}}$                          | 1.14                        | 1.18                        | 1.11                        | 0.81                        |
| $\beta_{\text{yyz}}$                          | 0.38                        | 0.34                        | 0.24                        | 0.35                        |
| $\beta_{\text{xzz}}$                          | 0.40                        | 0.49                        | 0.44                        | 0.33                        |
| $\beta_{\text{yzz}}$                          | -3.92                       | -3.85                       | 3.72                        | -3.21                       |
| $\beta_{\text{zzz}}$                          | 13.43                       | 13.13                       | 12.16                       | 9.77                        |
| $\beta_{\text{tot}}$                          | 22.96                       | 22.60                       | 20.20                       | 17.09                       |
| % Diff. ( $\beta_{\text{tot}}$ ) <sup>a</sup> | 0                           | 1.5                         | 12.0                        | 25.5                        |

<sup>a</sup> % Difference of  $\beta_{\text{tot}}$  amplitudes between PBE0 and other methods: [(PBE0-other method)/PBE0] $\times 100$

**Table S2.** The individual CPU times and difference of CPU times between 6-311G\* and 6-311+G\* basis sets for optimization of NDG compound **1** in three different states with PBE0 functional

|                                | CPU Time    |             |              |
|--------------------------------|-------------|-------------|--------------|
|                                | Anion       | Cation      | Neutral      |
| 6-311G*                        | 1 Day, 16h  | 1 Day, 4h   | 1Day, 1h     |
| 6-311+G*                       | 57Days, 15h | 45Days, 2h  | 49Days, 13h  |
| $\Delta_{\text{CPUTime}}$      | 56 Days     | 44 Days, 2h | 48 Days, 12h |
| Avg. $\Delta_{\text{CPUTime}}$ | 49.34 Days  |             |              |

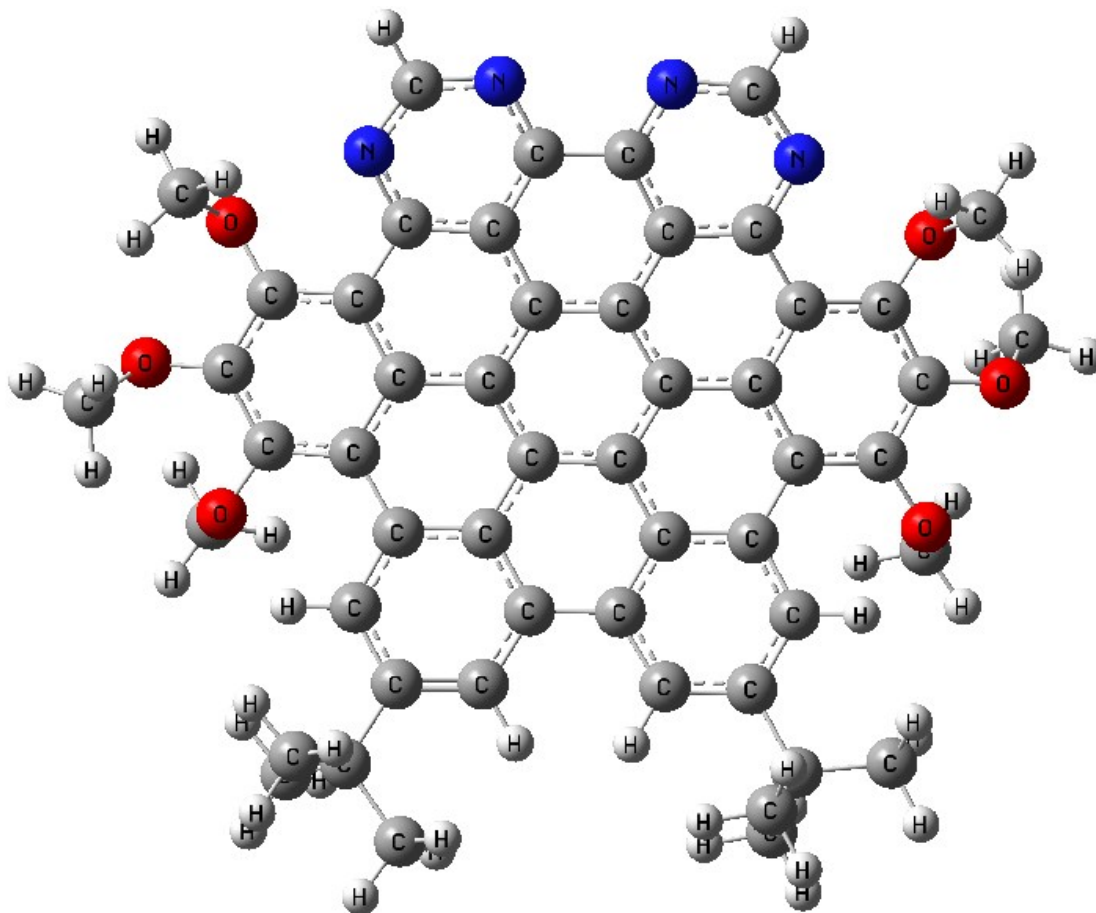

Optimized coordinates of **NDG compound 1** at PBE0/6-311G\* level of theory

**Total energy = -2674.7562515 a. u.**

**Dipole moment (field-independent basis) = 6.9065 Debye**

Optimized Cartesian Coordinates

|   |             |             |             |
|---|-------------|-------------|-------------|
| O | 5.68831318  | 0.52345319  | 3.62690046  |
| O | 6.92717632  | 0.94693796  | 1.23156563  |
| O | 5.67451084  | 0.62384675  | -1.06579530 |
| O | -5.50864119 | 0.84702523  | 3.75647647  |
| O | -6.83909451 | 1.17797823  | 1.47382663  |
| O | -5.62247303 | 0.93548290  | -0.93369830 |
| N | -3.38750604 | -0.23396718 | 4.96540017  |
| N | -1.31201663 | -0.45626354 | 6.11671802  |
| N | 1.45450946  | -0.51272487 | 6.08685664  |
| N | 3.51214033  | -0.37419445 | 4.89099179  |
| C | -2.75575024 | -0.05449291 | 3.80280917  |

|   |             |             |             |
|---|-------------|-------------|-------------|
| C | -1.34916438 | -0.14194740 | 3.73910699  |
| C | -0.66716298 | -0.31787280 | 4.95850586  |
| C | 0.79059651  | -0.34814320 | 4.94271234  |
| C | 1.45215176  | -0.20029840 | 3.70862231  |
| C | 2.86298713  | -0.17247627 | 3.74169062  |
| C | 0.74159687  | -0.11118857 | 2.47611563  |
| C | -0.66370401 | -0.08264315 | 2.49060585  |
| C | -1.39619542 | -0.02459229 | 1.29049714  |
| C | -2.83102085 | 0.11596108  | 1.32705435  |
| C | -3.50437337 | 0.20155683  | 2.57957297  |
| C | -4.86317984 | 0.55718434  | 2.60823642  |
| C | 1.45003138  | -0.07869426 | 1.26130212  |
| C | 2.88797944  | 0.00656036  | 1.26673179  |
| C | 3.59219396  | 0.06482689  | 2.50327007  |
| C | 4.96232733  | 0.37020967  | 2.49276941  |
| C | 6.42951678  | -0.62642404 | 4.01266297  |
| H | 7.10268768  | -0.94122571 | 3.20938523  |
| H | 5.75128664  | -1.43603346 | 4.29000382  |
| H | 7.01167126  | -0.33284880 | 4.88583292  |
| C | 7.30691862  | 2.15797523  | 1.87542995  |
| H | 7.21422148  | 2.08546155  | 2.95883750  |
| H | 6.69594350  | 2.99419313  | 1.51747395  |
| H | 8.34643406  | 2.32768206  | 1.59607121  |
| C | 5.74563138  | 1.96890152  | -1.50844111 |
| H | 6.22225383  | 2.60472002  | -0.75725791 |
| H | 4.74913737  | 2.35851977  | -1.74253857 |
| H | 6.35689436  | 1.96470278  | -2.41080038 |
| C | 4.94109362  | 0.44295501  | 0.06776242  |
| C | 5.61159416  | 0.61502888  | 1.28083208  |
| C | 3.57789044  | 0.09401095  | 0.02990805  |

|   |             |             |             |
|---|-------------|-------------|-------------|
| C | 2.84702354  | -0.15725045 | -1.21237440 |
| C | 3.50291200  | -0.42970623 | -2.41955530 |
| H | 4.57835815  | -0.48342303 | -2.41345572 |
| C | 2.81315592  | -0.65288119 | -3.60446329 |
| C | 1.42541000  | -0.57723846 | -3.57599569 |
| H | 0.88614842  | -0.72585496 | -4.50275928 |
| C | 0.71269536  | -0.34961236 | -2.40073898 |
| C | 1.42970809  | -0.17651659 | -1.19150483 |
| C | 0.72298672  | -0.08692494 | 0.05092597  |
| C | 5.04487164  | -1.03818403 | -4.75658960 |
| H | 5.46577215  | -0.08731836 | -4.41652084 |
| H | 5.50691369  | -1.27401378 | -5.71963681 |
| H | 5.34757045  | -1.81527864 | -4.04899924 |
| C | 3.52658786  | -0.96949739 | -4.91952313 |
| C | 3.20451479  | 0.12317087  | -5.94853206 |
| H | 3.70639350  | -0.08741053 | -6.89858773 |
| H | 3.54132181  | 1.10331483  | -5.59828865 |
| H | 2.13240307  | 0.19414227  | -6.15042996 |
| C | 3.04239681  | -2.32691829 | -5.44829630 |
| H | 3.54642425  | -2.57155866 | -6.38900574 |
| H | 1.96614462  | -2.33351689 | -5.64012409 |
| H | 3.25636087  | -3.12549805 | -4.73229285 |
| C | -0.74610160 | -0.29442358 | -2.38780108 |
| C | -1.42744287 | -0.09878612 | -1.16516636 |
| C | -0.69465496 | -0.05590818 | 0.06535566  |
| C | -2.84433240 | 0.00447355  | -1.15852390 |
| C | -3.54082488 | 0.24493800  | 0.10586558  |
| C | -5.54866796 | 0.75531884  | 1.40615151  |
| C | -4.89318548 | 0.62753243  | 0.18225920  |
| C | -3.52916399 | -0.18895796 | -2.35924488 |

|   |             |             |             |
|---|-------------|-------------|-------------|
| H | -4.60697865 | -0.16865802 | -2.34455413 |
| C | -2.87456881 | -0.41612910 | -3.56789139 |
| C | -1.48947763 | -0.43891890 | -3.56260488 |
| H | -0.97085700 | -0.58768693 | -4.49873290 |
| C | -2.82726090 | -0.85735096 | -6.07049848 |
| H | -3.46223286 | -1.00659440 | -6.94843636 |
| H | -2.19834213 | -1.74715539 | -5.96969721 |
| H | -2.18050614 | 0.00027286  | -6.27999879 |
| C | -3.70053377 | -0.63003830 | -4.83670870 |
| C | -4.57609141 | 0.60485486  | -5.09081457 |
| H | -5.26303305 | 0.79341743  | -4.26166187 |
| H | -5.17760429 | 0.46688415  | -5.99524609 |
| H | -3.96260745 | 1.50052612  | -5.22618212 |
| C | -4.59902076 | -1.86106806 | -4.65266682 |
| H | -4.00184761 | -2.75890683 | -4.46904447 |
| H | -5.19962259 | -2.03209344 | -5.55209186 |
| H | -5.28747636 | -1.74255806 | -3.81207580 |
| C | -6.35674084 | -0.16072083 | 4.27647570  |
| H | -5.77354211 | -1.04071889 | 4.55753862  |
| H | -7.13926923 | -0.42844440 | 3.55991538  |
| H | -6.81766762 | 0.26419550  | 5.16744367  |
| C | -7.81420160 | 0.32726617  | 0.88417762  |
| H | -7.71007860 | -0.69708334 | 1.25771597  |
| H | -7.73952080 | 0.32231345  | -0.20415589 |
| H | -8.78145195 | 0.72486938  | 1.19051456  |
| C | 2.77377149  | -0.53936056 | 5.98263959  |
| H | 3.32366642  | -0.71351228 | 6.90507560  |
| C | -2.63341654 | -0.43043530 | 6.04075141  |
| H | -3.16973220 | -0.58482967 | 6.97461687  |
| C | -5.69455307 | 2.33657487  | -1.18295012 |



|   |             |            |             |
|---|-------------|------------|-------------|
| H | -4.69619219 | 2.74515764 | -1.36622314 |
| H | -6.16198460 | 2.85438590 | -0.34167528 |
| H | -6.30729833 | 2.45906040 | -2.07599157 |

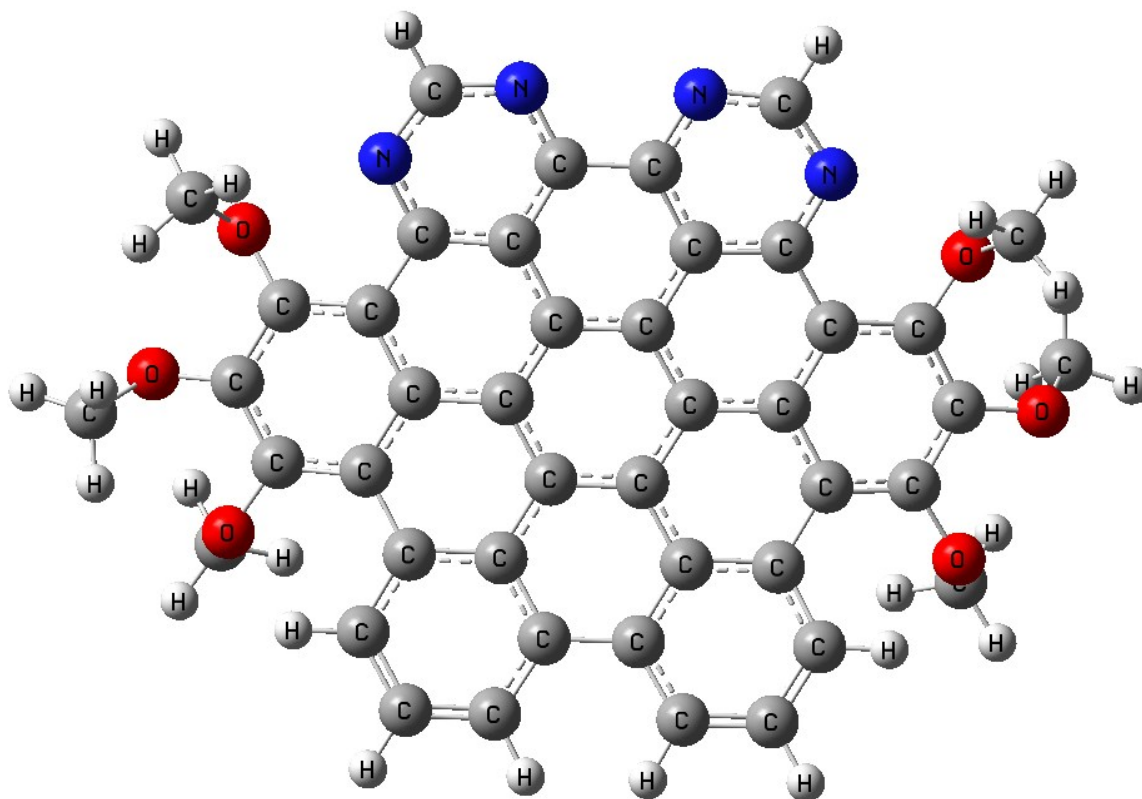

Optimized coordinates of **NDG compound 2** at PBE0/6-311G\* level of theory

**Total energy** = -2360.5901685 a. u.

**Dipole moment (field-independent basis)** = 8.0463 Debye

Optimized Cartesian Coordinates

|   |             |             |             |
|---|-------------|-------------|-------------|
| O | 5.67158155  | -0.20280664 | 2.59162260  |
| O | 6.92997450  | -0.20748082 | 0.16511518  |
| O | 5.60538224  | -0.54819143 | -2.09112888 |
| O | -5.31128098 | 1.94727132  | 2.67780451  |
| O | -6.60633407 | 2.27662562  | 0.37211005  |
| O | -5.48817536 | 1.59745501  | -1.99799539 |
| N | -3.38364556 | 0.64349500  | 3.98414841  |

|   |             |             |             |
|---|-------------|-------------|-------------|
| N | -1.35559202 | 0.19291795  | 5.15236145  |
| N | 1.36276076  | -0.31417651 | 5.13099895  |
| N | 3.39912440  | -0.62136624 | 3.93095088  |
| C | -2.74837491 | 0.60647375  | 2.81024677  |
| C | -1.37660640 | 0.28267083  | 2.75538509  |
| C | -0.71471056 | 0.11384022  | 3.98657714  |
| C | 0.71833142  | -0.15408600 | 3.97527944  |
| C | 1.37716473  | -0.23244467 | 2.73353973  |
| C | 2.77457166  | -0.42743357 | 2.76680809  |
| C | 0.67240367  | -0.14727044 | 1.49675677  |
| C | -0.70913739 | 0.11065785  | 1.50710652  |
| C | -1.43981898 | 0.17475132  | 0.30597001  |
| C | -2.83106673 | 0.55357151  | 0.33048398  |
| C | -3.46250938 | 0.86757193  | 1.56834349  |
| C | -4.74278945 | 1.44565502  | 1.56264633  |
| C | 1.35913288  | -0.34430921 | 0.28482127  |
| C | 2.79290449  | -0.48977567 | 0.28759323  |
| C | 3.51497123  | -0.42623908 | 1.51310689  |
| C | 4.91620798  | -0.34423921 | 1.47558544  |
| C | 6.22575418  | -1.41469222 | 3.08677867  |
| H | 6.82703822  | -1.90902232 | 2.31766770  |
| H | 5.43155397  | -2.07473941 | 3.44160728  |
| H | 6.86121346  | -1.13609555 | 3.92705042  |
| C | 7.51113267  | 0.97426208  | 0.70538073  |
| H | 7.44589467  | 0.99572083  | 1.79284171  |
| H | 7.02172642  | 1.86624239  | 0.29883926  |
| H | 8.55399578  | 0.96105744  | 0.38965570  |
| C | 5.90237749  | 0.72072992  | -2.65098395 |
| H | 6.51349872  | 1.31747036  | -1.96837315 |
| H | 4.98436034  | 1.26489537  | -2.89695917 |

|   |             |             |             |
|---|-------------|-------------|-------------|
| H | 6.46785849  | 0.53024258  | -3.56278270 |
| C | 4.87361728  | -0.50084254 | -0.94426054 |
| C | 5.58001576  | -0.32069196 | 0.24708958  |
| C | 3.47243003  | -0.63146221 | -0.94831944 |
| C | 2.69757306  | -0.88473057 | -2.16156372 |
| C | 3.28509348  | -1.37907332 | -3.33139436 |
| H | 4.33822569  | -1.61106206 | -3.34224697 |
| C | 2.52842474  | -1.59640955 | -4.46987608 |
| C | 1.17766433  | -1.31073309 | -4.48257690 |
| H | 0.62316459  | -1.47502240 | -5.39764233 |
| C | 0.53314201  | -0.84853956 | -3.33305234 |
| C | 1.29140985  | -0.67493133 | -2.14891694 |
| C | 0.62328339  | -0.35057110 | -0.92142546 |
| C | -0.89375985 | -0.55121144 | -3.32944641 |
| C | -1.52371109 | -0.12709557 | -2.13263724 |
| C | -0.77172153 | -0.08799373 | -0.91143844 |
| C | -2.90446120 | 0.21307614  | -2.13115605 |
| C | -3.52971220 | 0.68247781  | -0.89629367 |
| C | -5.40609356 | 1.63924219  | 0.34708427  |
| C | -4.80053113 | 1.28707372  | -0.85788218 |
| C | -3.63484728 | 0.02704412  | -3.31056753 |
| H | -4.69524869 | 0.22165234  | -3.31885092 |
| C | -3.01845618 | -0.41369948 | -4.46836747 |
| C | -1.66348941 | -0.67751372 | -4.48755375 |
| H | -1.21134646 | -0.99558475 | -5.41819341 |
| C | -6.30707018 | 1.15084000  | 3.29393337  |
| H | -5.87400672 | 0.21693330  | 3.65953998  |
| H | -7.13482929 | 0.95012587  | 2.60714611  |
| H | -6.67596338 | 1.73107533  | 4.13891396  |
| C | -7.72048946 | 1.54520575  | -0.12471794 |

|   |             |             |             |
|---|-------------|-------------|-------------|
| H | -7.80440518 | 0.57753751  | 0.38169622  |
| H | -7.64873931 | 1.38403062  | -1.20113568 |
| H | -8.59869195 | 2.14784380  | 0.10528022  |
| C | 2.65907501  | -0.56262015 | 5.03219619  |
| H | 3.18643714  | -0.73541318 | 5.96790248  |
| C | -2.65609566 | 0.42754775  | 5.07375299  |
| H | -3.19630727 | 0.45141768  | 6.01774328  |
| C | -5.32294549 | 2.95431491  | -2.40032392 |
| H | -4.27351319 | 3.16146621  | -2.63091715 |
| H | -5.67527115 | 3.63337183  | -1.61987321 |
| H | -5.92494002 | 3.08343370  | -3.29952104 |
| H | -3.60826927 | -0.55054456 | -5.36956353 |
| H | 3.00500060  | -1.99327364 | -5.36098043 |

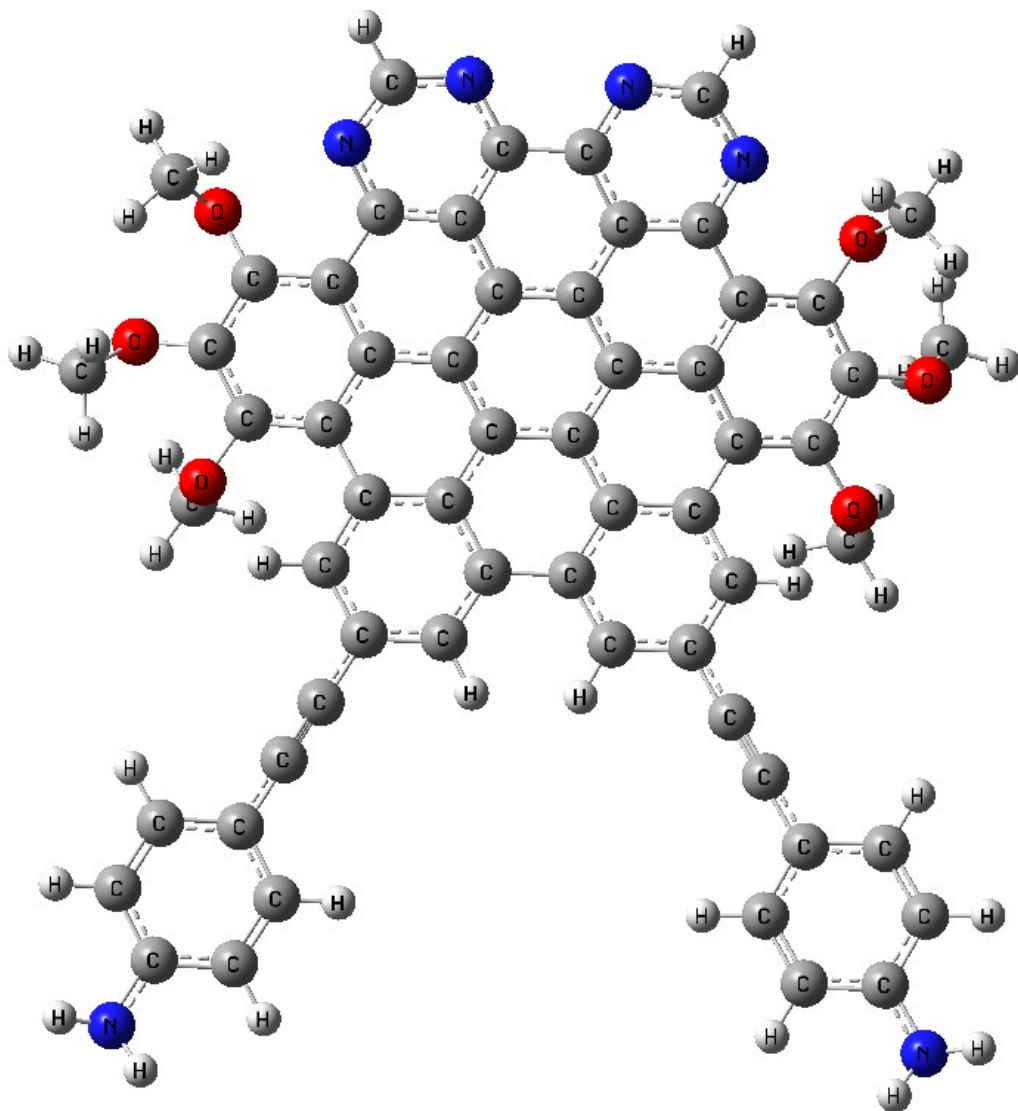

Optimized coordinates of **NDG compound 3** at PBE0/6-311G\* level of theory

**Total energy = -3085.0338107 a. u.**

**Dipole moment (field-independent basis) = 14.034 Debye**

Optimized Cartesian Coordinates

|   |             |             |             |
|---|-------------|-------------|-------------|
| O | 5.09579100  | 5.33168400  | 0.30349700  |
| O | 2.86609800  | 6.73011500  | 1.02235600  |
| O | 0.45557700  | 5.65738100  | 0.92981500  |
| O | 4.44525000  | -5.83523900 | 0.40364900  |
| O | 2.12419300  | -7.01751400 | 0.96944100  |
| O | -0.20411700 | -5.63992500 | 0.99974700  |
| N | 5.66404500  | -3.78473500 | -0.79451000 |
| N | 6.92782600  | -1.78990400 | -1.11790200 |

|   |             |             |             |
|---|-------------|-------------|-------------|
| N | 7.09365700  | 0.97103300  | -1.11809900 |
| N | 6.07803800  | 3.10311600  | -0.79470400 |
| C | 4.58004300  | -3.07788500 | -0.46560100 |
| C | 4.60762900  | -1.66858000 | -0.52120000 |
| C | 5.84405100  | -1.06969300 | -0.82974200 |
| C | 5.93133500  | 0.38554600  | -0.83020200 |
| C | 4.77530900  | 1.12796100  | -0.52193300 |
| C | 4.91618300  | 2.53118800  | -0.46907800 |
| C | 3.51240400  | 0.50424500  | -0.30070100 |
| C | 3.42769500  | -0.89907200 | -0.30092100 |
| C | 2.19246100  | -1.54693800 | -0.11502100 |
| C | 2.14322700  | -2.98396600 | -0.00579000 |
| C | 3.34533900  | -3.74503800 | -0.07761100 |
| C | 3.31839700  | -5.11009200 | 0.25239200  |
| C | 2.36458700  | 1.29522300  | -0.11017000 |
| C | 2.48846200  | 2.72649700  | 0.00263300  |
| C | 3.77219900  | 3.33856300  | -0.06968600 |
| C | 3.89956600  | 4.69618800  | 0.26485000  |
| C | 5.40308800  | 6.08381300  | -0.86299200 |
| H | 4.62177200  | 6.82274600  | -1.06506800 |
| H | 5.53629200  | 5.41602400  | -1.71664100 |
| H | 6.34463900  | 6.59187400  | -0.65606000 |
| C | 3.65525800  | 7.01938900  | 2.17080900  |
| H | 4.71144300  | 6.81553200  | 1.99537600  |
| H | 3.31267200  | 6.43493200  | 3.03199900  |
| H | 3.50456800  | 8.07927500  | 2.37395300  |
| C | 0.14876200  | 5.71261300  | 2.31400500  |
| H | 0.97495900  | 6.15181000  | 2.88018000  |
| H | -0.07976000 | 4.71604800  | 2.70592800  |
| H | -0.73007800 | 6.34956000  | 2.40912300  |

|   |             |             |             |
|---|-------------|-------------|-------------|
| C | 1.50406400  | 4.84969800  | 0.61379800  |
| C | 2.77591000  | 5.42470800  | 0.66064200  |
| C | 1.32730800  | 3.50199000  | 0.24791900  |
| C | 0.01238800  | 2.87107900  | 0.13164200  |
| C | -1.15899800 | 3.61936100  | 0.02120900  |
| H | -1.10942400 | 4.69549800  | -0.01562800 |
| C | -2.41105500 | 3.00629600  | -0.06293500 |
| C | -2.49249900 | 1.61610500  | -0.02100200 |
| H | -3.47702100 | 1.17030700  | -0.06555300 |
| C | -1.34920100 | 0.82608000  | 0.04527200  |
| C | -0.07830700 | 1.45244400  | 0.08352300  |
| C | 1.10978500  | 0.65654100  | 0.00966000  |
| C | -1.43715200 | -0.63109700 | 0.06868300  |
| C | -0.25079000 | -1.40669300 | 0.10023800  |
| C | 1.02436100  | -0.76141700 | 0.01141600  |
| C | -0.33163200 | -2.82496000 | 0.17327100  |
| C | 0.89858200  | -3.61274200 | 0.24857700  |
| C | 2.10069300  | -5.71767600 | 0.57340600  |
| C | 0.91942100  | -4.97803500 | 0.59085000  |
| C | -1.58880200 | -3.42575800 | 0.11339400  |
| H | -1.67472200 | -4.49998100 | 0.10687400  |
| C | -2.75904000 | -2.66670000 | 0.05142500  |
| C | -2.66939600 | -1.27652200 | 0.05473800  |
| H | -3.59301200 | -0.71431400 | 0.03065400  |
| C | 4.78620100  | -6.70613200 | -0.65967500 |
| H | 5.01839600  | -6.13271100 | -1.56010600 |
| H | 3.98548000  | -7.42539800 | -0.85580600 |
| H | 5.67708200  | -7.24262900 | -0.33506300 |
| C | 1.38150100  | -7.93501500 | 0.17601600  |
| H | 1.66019200  | -7.84703400 | -0.87969900 |

|   |             |             |             |
|---|-------------|-------------|-------------|
| H | 0.30712200  | -7.77838600 | 0.27930200  |
| H | 1.65164600  | -8.92707300 | 0.53704200  |
| C | 7.08478100  | 2.29459900  | -1.10566900 |
| H | 8.01788700  | 2.78247500  | -1.37926900 |
| C | 6.75994900  | -3.10300400 | -1.10660600 |
| H | 7.62728600  | -3.69910500 | -1.38227300 |
| C | -0.34445900 | -5.68376700 | 2.41717900  |
| H | -0.42713300 | -4.67253600 | 2.82678100  |
| H | 0.50342400  | -6.20317600 | 2.87120700  |
| H | -1.26431800 | -6.23230500 | 2.61776500  |
| C | -3.58477700 | 3.79401800  | -0.18164600 |
| C | -4.58618100 | 4.46829900  | -0.28417000 |
| C | -4.02293900 | -3.30823500 | -0.00893200 |
| C | -5.10127500 | -3.85810700 | -0.06320500 |
| C | -5.75310800 | 5.26189300  | -0.40597600 |
| C | -5.66835600 | 6.65379800  | -0.56115100 |
| C | -7.03110700 | 4.68387100  | -0.37701900 |
| C | -6.80394700 | 7.42998600  | -0.68313300 |
| H | -4.69056400 | 7.12341100  | -0.58885100 |
| C | -8.16871100 | 5.45753800  | -0.49764400 |
| H | -7.12219800 | 3.60910800  | -0.25851400 |
| C | -8.07879800 | 6.84750500  | -0.65562300 |
| H | -6.70930400 | 8.50667800  | -0.79867300 |
| H | -9.14681500 | 4.98432500  | -0.46622000 |
| C | -6.36060300 | -4.50331800 | -0.12897000 |
| C | -6.45527000 | -5.90087900 | -0.20879000 |
| C | -7.55463800 | -3.76681500 | -0.11837100 |
| C | -7.68180600 | -6.53176100 | -0.27632800 |
| H | -5.54525400 | -6.49178300 | -0.22044100 |
| C | -8.78282200 | -4.39466800 | -0.18503400 |



|   |              |             |             |
|---|--------------|-------------|-------------|
| H | -7.50691800  | -2.68448100 | -0.05787100 |
| C | -8.87209900  | -5.79120600 | -0.26777800 |
| H | -7.72632900  | -7.61636500 | -0.33330800 |
| H | -9.69246100  | -3.79975900 | -0.16983000 |
| N | -10.09959000 | -6.42336500 | -0.28206100 |
| N | -9.21589500  | 7.62792100  | -0.72406100 |
| H | -10.88064400 | -5.86868900 | -0.59129100 |
| H | -10.11300600 | -7.35748800 | -0.65701900 |
| H | -9.10634300  | 8.53499400  | -1.14665900 |
| H | -10.05748600 | 7.16055300  | -1.01844900 |
